# Supplementary material for: New Isocoumarin and Pyrone Derivatives from the Chinese Mangrove Plant Rhizophora mangle-Associated Fungus Phomopsis sp. DHS-11
Source: MDPI journal article supplement (doi:10.3390/molecules28093756), 2023-04-27
Supplement: s1 [file s1]

Figure S1.  $^1\text{H}$  NMR (500 MHz,  $\text{DMSO}-d_6$ ) spectrum of new compound **1**  
Figure S2.  $^{13}\text{C}$  NMR (125 MHz,  $\text{DMSO}-d_6$ ) spectrum of new compound **1**  
Figure S3. DEPT135 spectrum of new compound **1**  
Figure S4. HSQC spectrum of new compound **1**  
Figure S5. HMBC spectrum of new compound **1**  
Figure S6.  $^1\text{H}$ - $^1\text{H}$  COSY spectrum of new compound **1**  
Figure S7. NOESY spectrum of new compound **1**  
Figure S8. The HRESIMS spectrum of the new compound **1**  
Figure S9.  $^1\text{H}$  NMR (500 MHz,  $\text{DMSO}-d_6$ ) spectrum of new compound **2**  
Figure S10.  $^{13}\text{C}$  NMR (125 MHz,  $\text{DMSO}-d_6$ ) spectrum of new compound **2**  
Figure S11. DEPT135 spectrum of new compound **2**  
Figure S12. HSQC spectrum of new compound **2**  
Figure S13. HMBC spectrum of new compound **2**  
Figure S14.  $^1\text{H}$ - $^1\text{H}$  COSY spectrum of new compound **2**  
Figure S15. NOESY spectrum of new compound **2**  
Figure S16. The HRESIMS spectrum of new compound **2**  
Figure S17.  $^1\text{H}$  NMR (500 MHz,  $\text{DMSO}-d_6$ ) spectrum of new compound **3**  
Figure S18.  $^{13}\text{C}$  NMR (125 MHz,  $\text{DMSO}-d_6$ ) spectrum of new compound **3**  
Figure S19. DEPT135 spectrum of new compound **3**  
Figure S20. HSQC spectrum of new compound **3**  
Figure S21. HMBC spectrum of new compound **3**  
Figure S22.  $^1\text{H}$ - $^1\text{H}$  COSY spectrum of new compound **3**  
Figure S23. NOESY spectrum of new compound **3**  
Figure S24. The HRESIMS spectrum of new compound **3**  
Figure S25.  $^1\text{H}$  NMR (500 MHz,  $\text{CD}_3\text{OD}$ ) spectrum of new compound **4**  
Figure S26.  $^{13}\text{C}$  NMR (125 MHz,  $\text{CD}_3\text{OD}$ ) spectrum of new compound **4**  
Figure S27. DEPT135 spectrum of new compound **4**  
Figure S28. HSQC spectrum of new compound **4**  
Figure S29. HMBC spectrum of new compound **4**  
Figure S30.  $^1\text{H}$ - $^1\text{H}$  COSY spectrum of new compound **4**  
Figure S31. NOESY spectrum of new compound **4**  
Figure S32. The HRESIMS spectrum of new compound **4**

Figure S1.  $^1\text{H}$  NMR (500 MHz,  $\text{DMSO-}d_6$ ) spectrum of new compound **1**

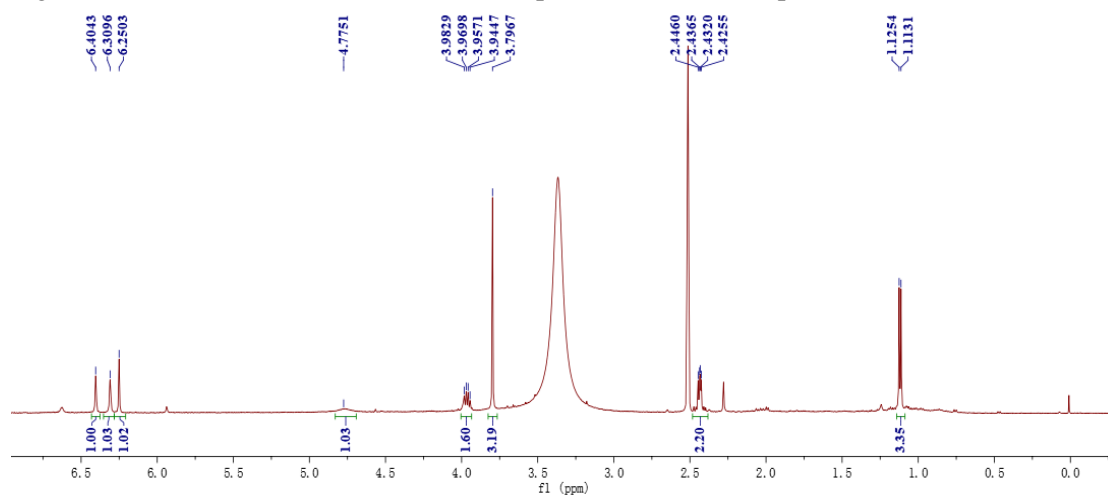

Figure S2.  $^{13}\text{C}$  NMR (125 MHz,  $\text{DMSO-}d_6$ ) spectrum of new compound **1**

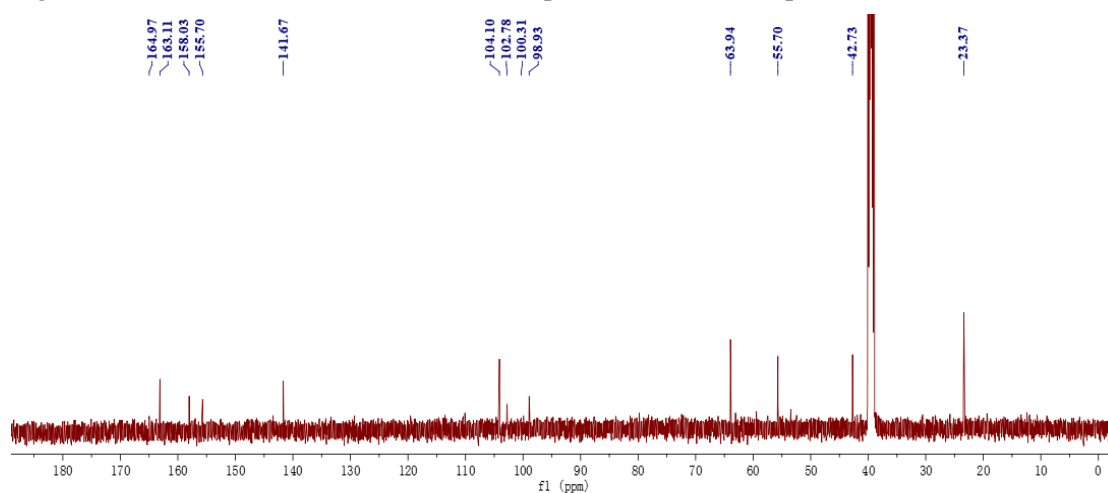

Figure S3. DEPT135 spectrum of new compound **1**

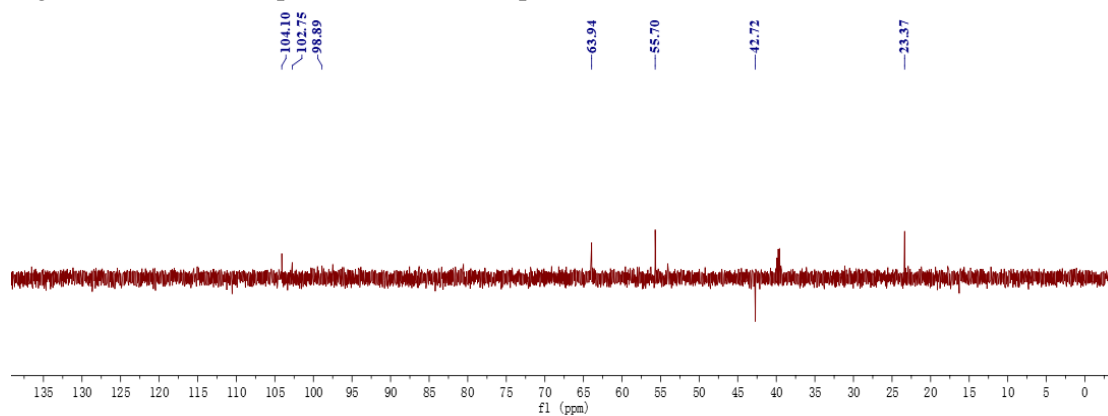

Figure S4. HSQC spectrum of new compound **1**

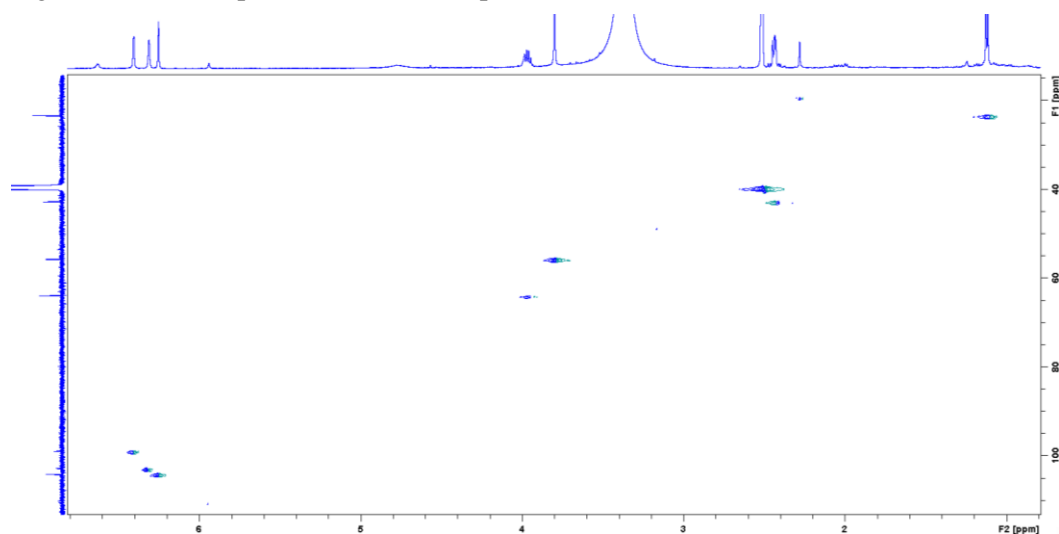

Figure S5. HMBC spectrum of new compound **1**

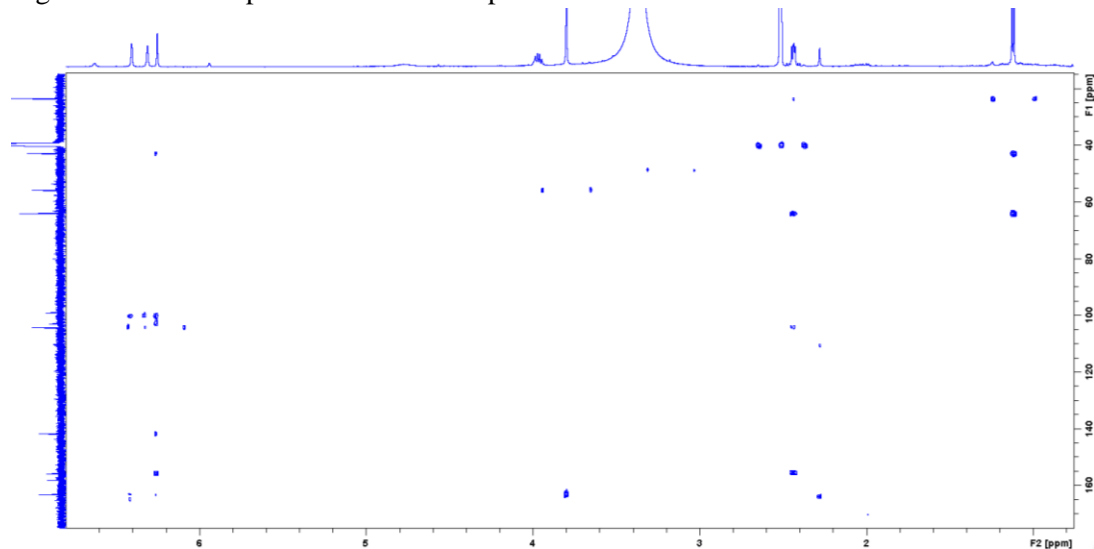

Figure S6.  $^1\text{H}$ - $^1\text{H}$  COSY spectrum of new compound **1**

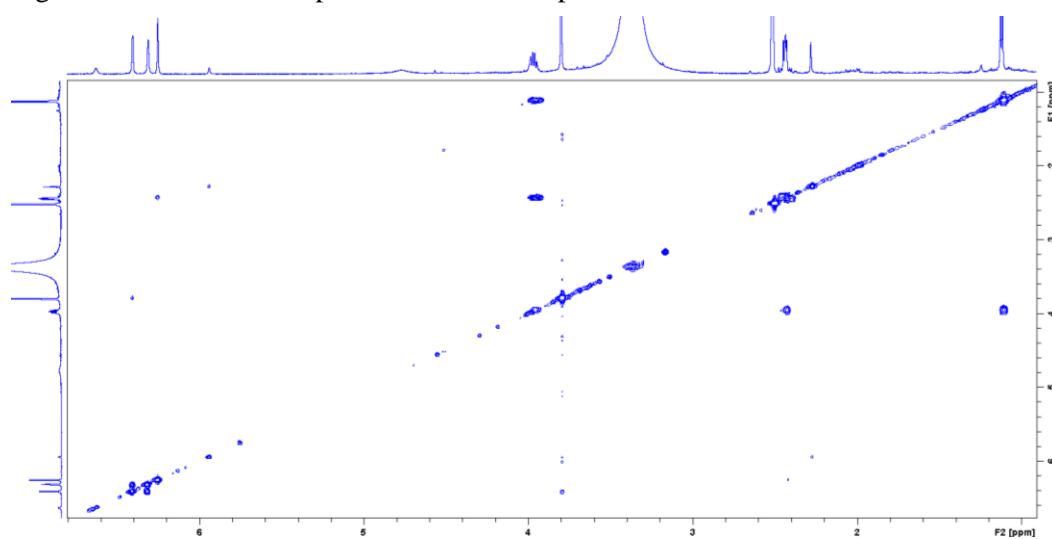

Figure S7. NOESY spectrum of new compound **1**

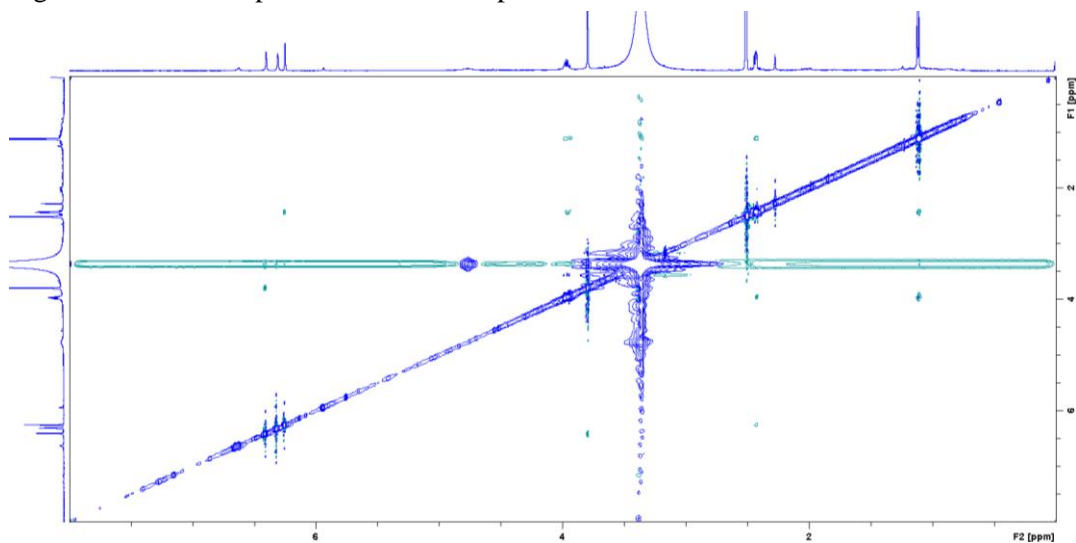

Figure S8. The HRESIMS spectrum of the new compound **1** ( $m/z$  249.0774  $[M-H]^-$  (calcd for  $C_{13}H_{13}O_5$  249.0768))

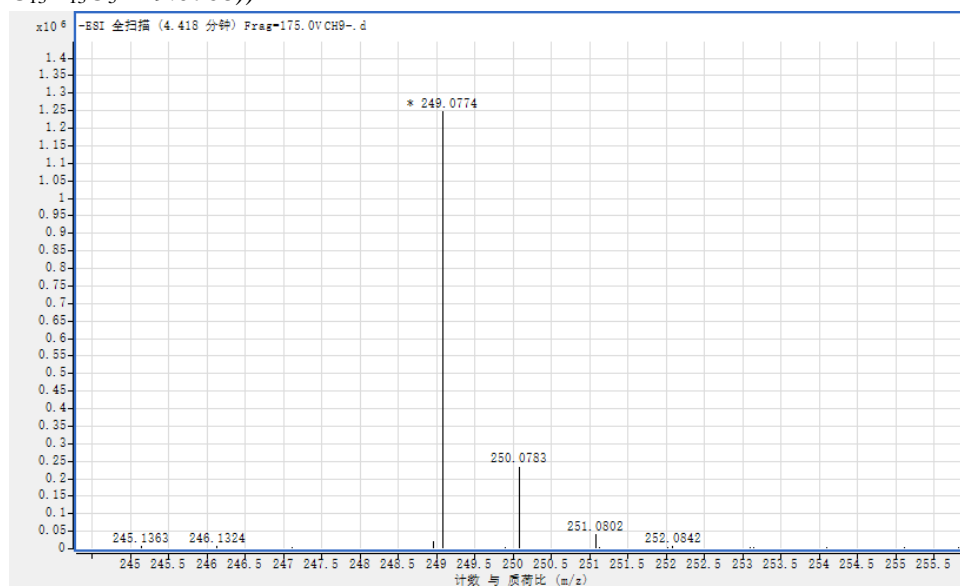

Figure S9.  $^1H$  NMR (500 MHz,  $DMSO-d_6$ ) spectrum of new compound **2**

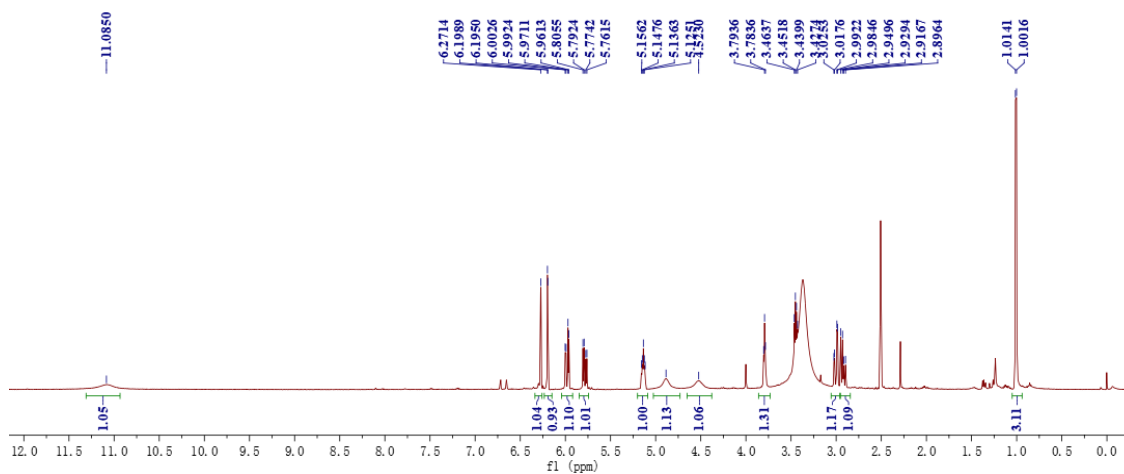

Figure S10.  $^{13}\text{C}$  NMR (125 MHz,  $\text{DMSO}-d_6$ ) spectrum of new compound **2**

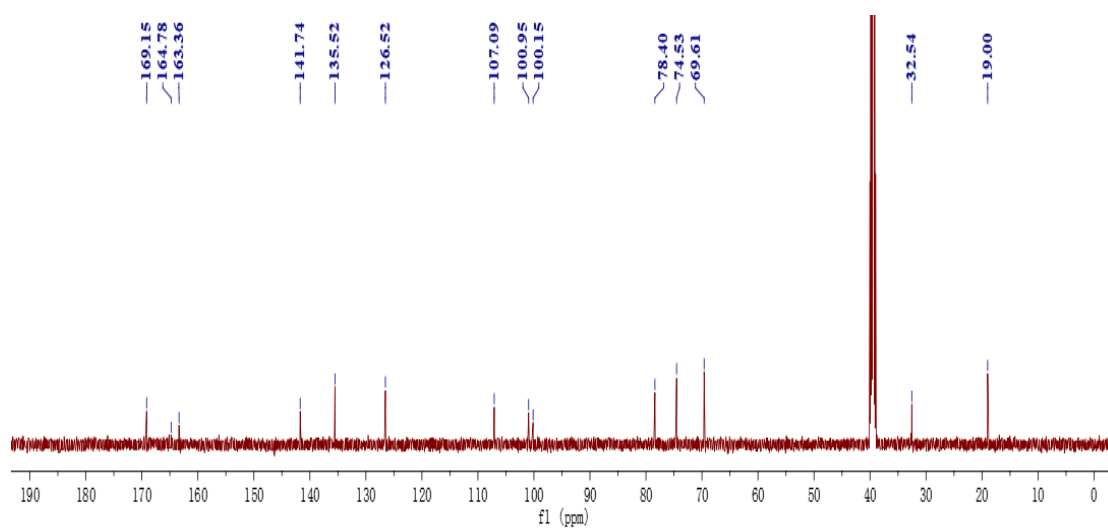

Figure S11. DEPT135 spectrum of new compound **2**

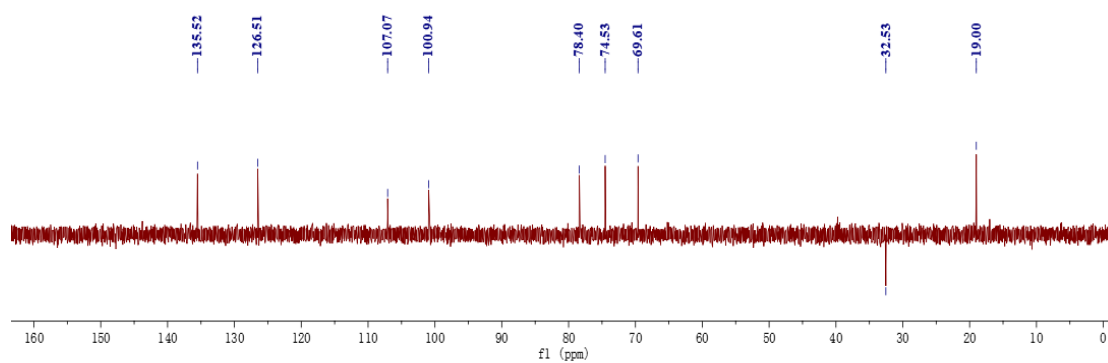

Figure S12. HSQC spectrum of new compound **2**

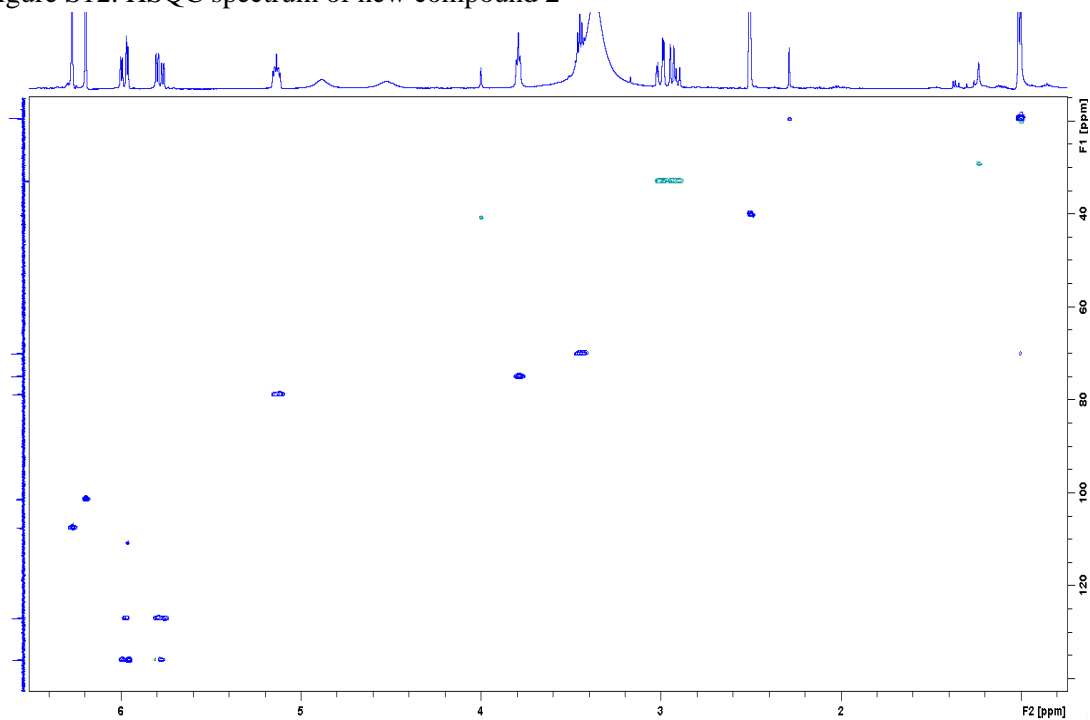

Figure S13. HMBC spectrum of new compound **2**

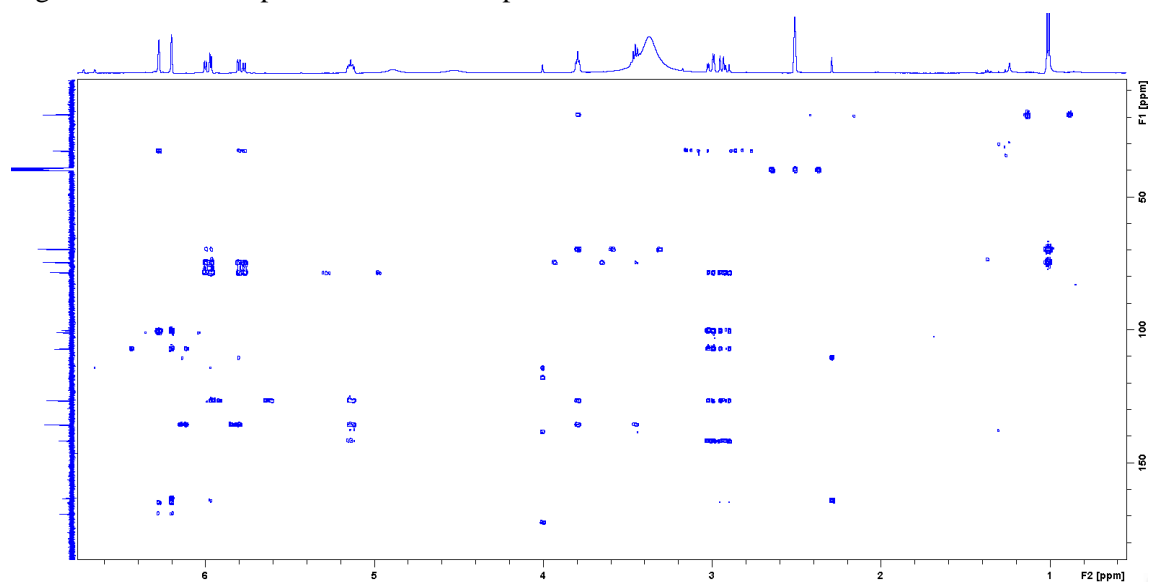

Figure S14.  $^1\text{H}$ - $^1\text{H}$  COSY spectrum of new compound **2**

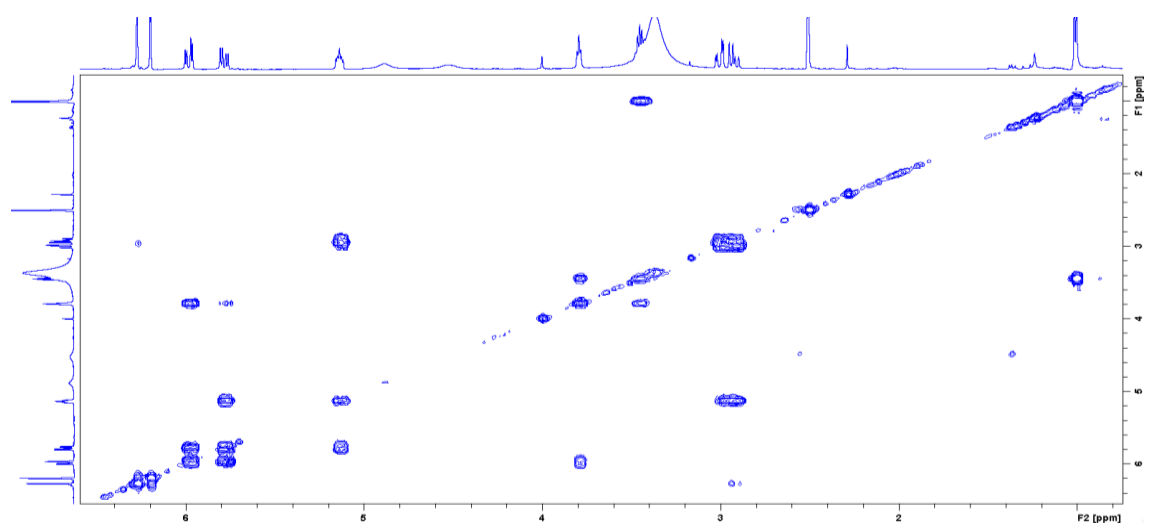

Figure S15. NOESY spectrum of new compound **2**

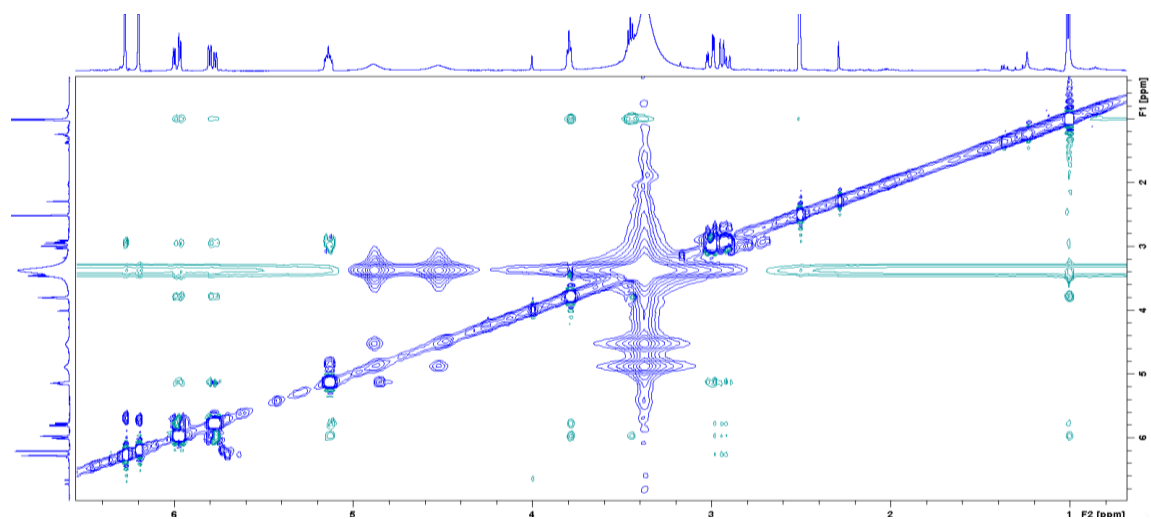

Figure S16. The HRESIMS spectrum of new compound **2** ( $m/z$  281.1012  $[M+H]^+$  (calcd for  $C_{14}H_{17}O_6$ , 281.1020))

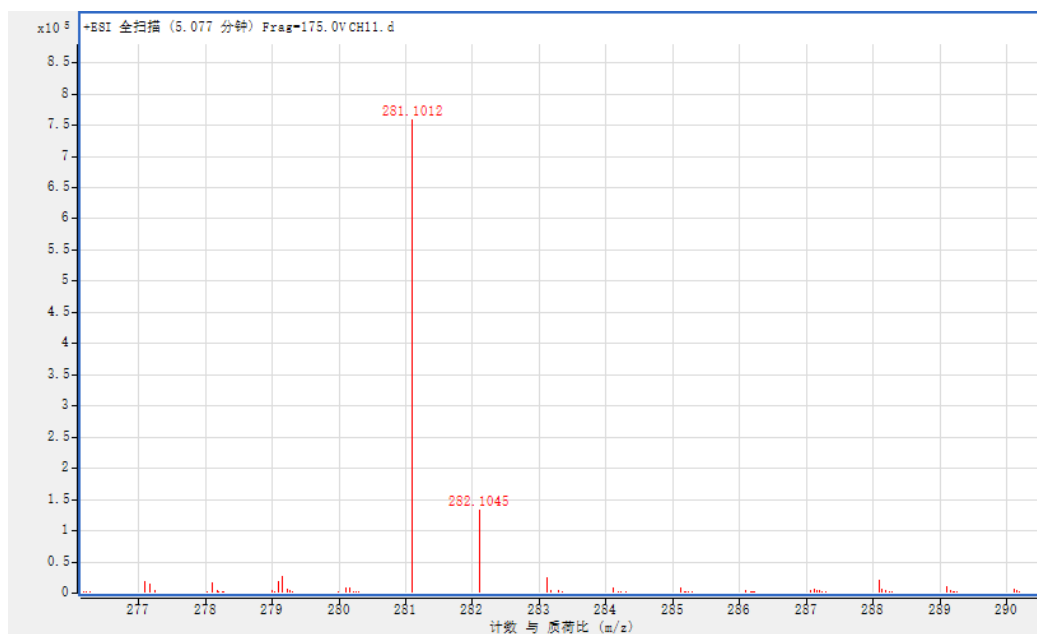

Figure S17.  $^1H$  NMR (500 MHz,  $DMSO-d_6$ ) spectrum of new compound **3**

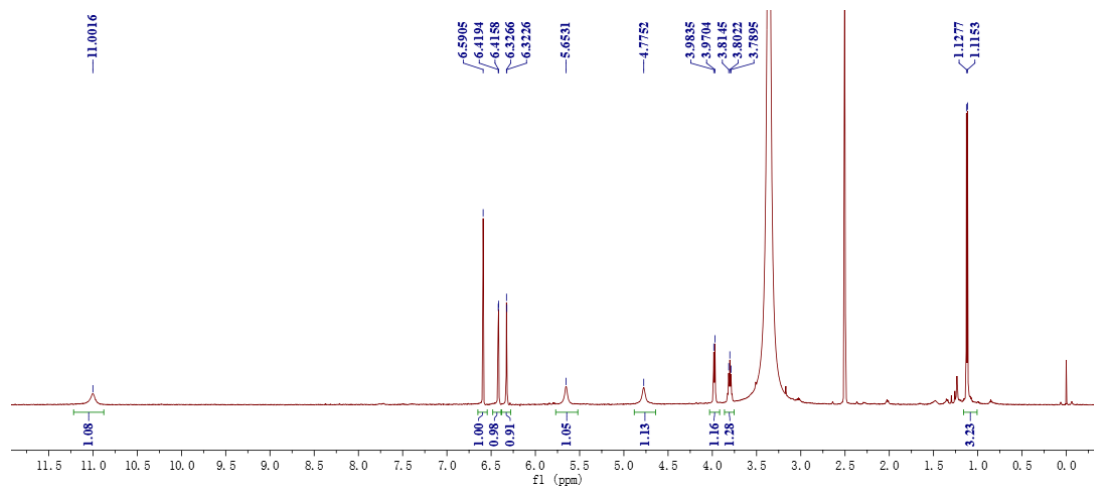

Figure S18.  $^{13}C$  NMR (125 MHz,  $DMSO-d_6$ ) spectrum of new compound **3**

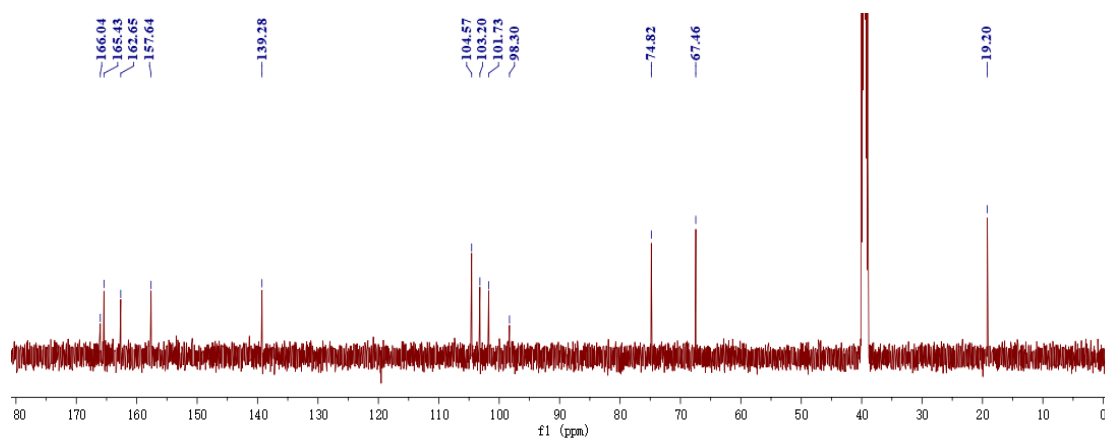

Figure S19. DEPT135 spectrum of new compound **3**

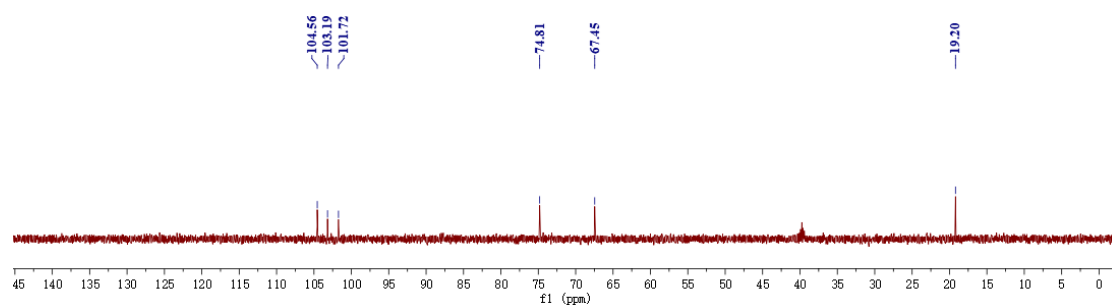

Figure S20. HSQC spectrum of new compound **3**

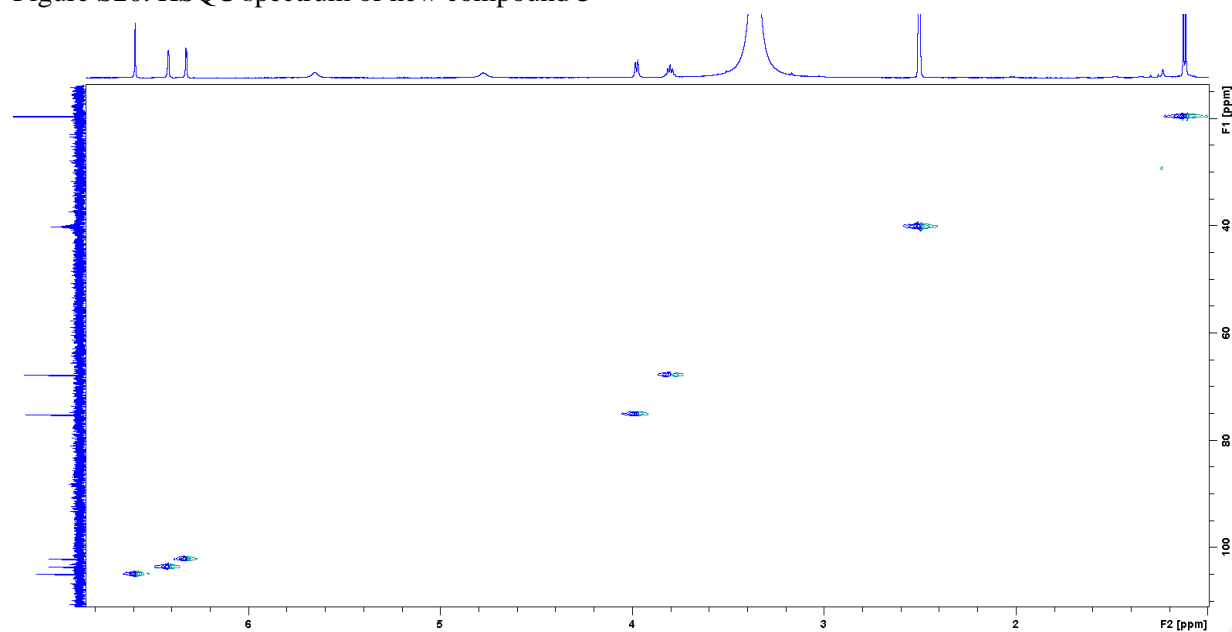

Figure S21. HMBC spectrum of new compound **3**

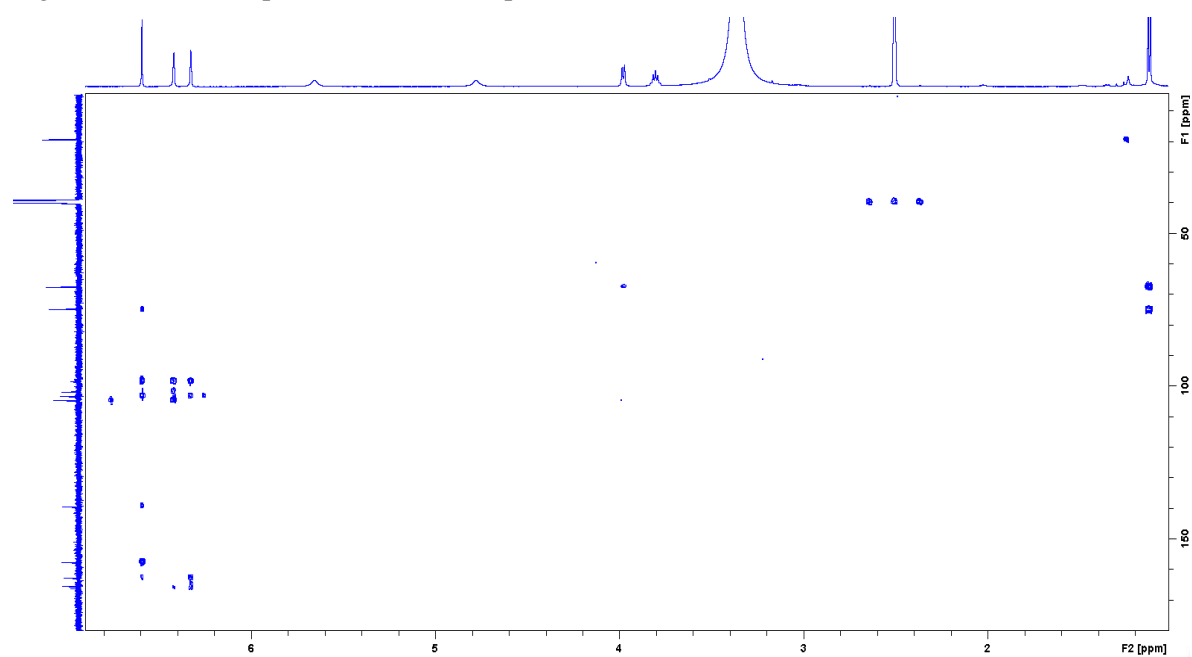



Figure S22.  $^1\text{H}$ - $^1\text{H}$  COSY spectrum of new compound **3**

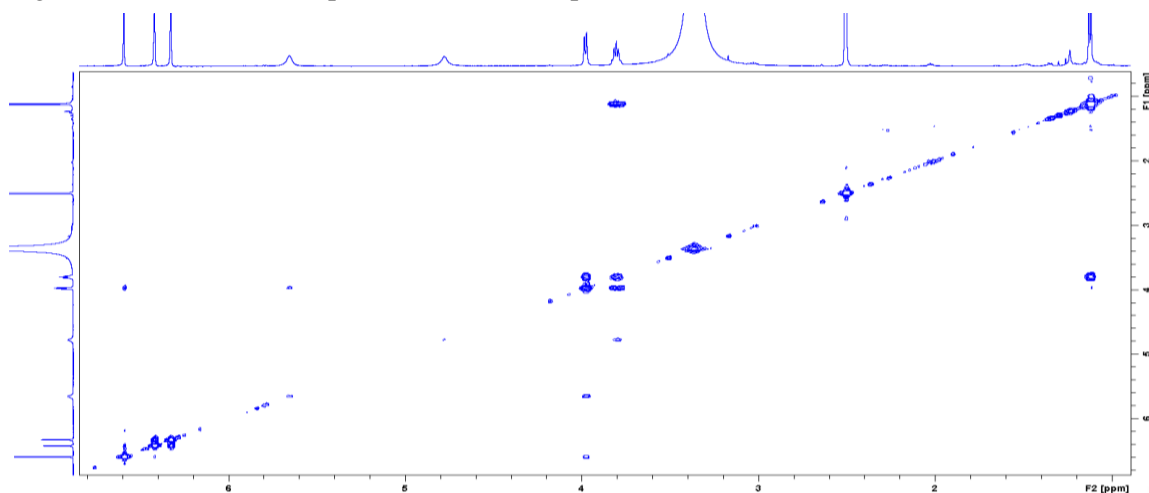

Figure S23. NOESY spectrum of new compound **3**

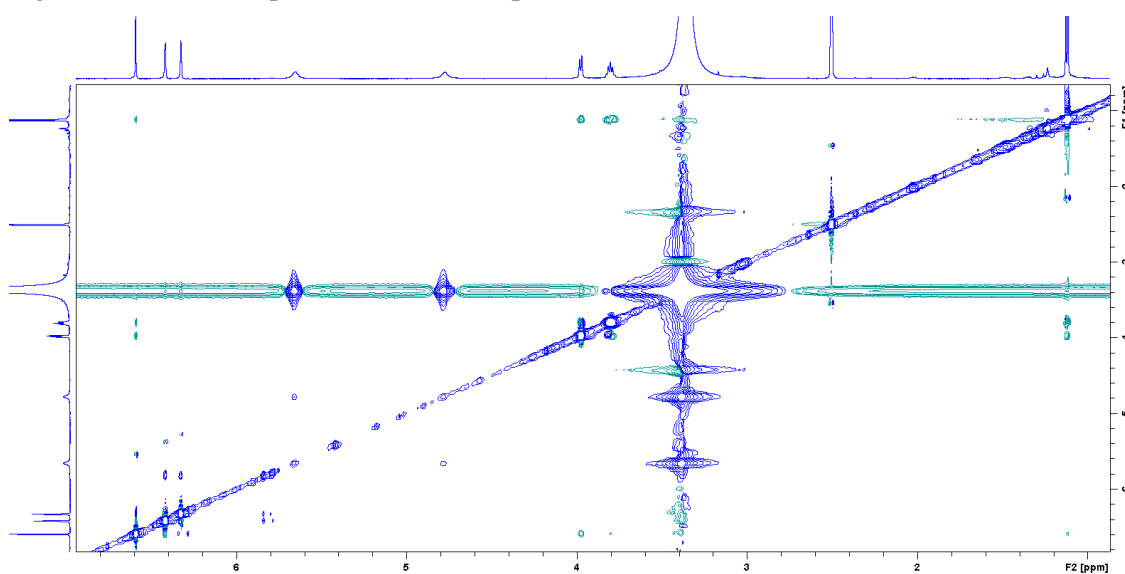

Figure S24. The HRESIMS spectrum of new compound **3** ( $m/z$  275.0520  $[\text{M}+\text{Na}]^+$  (calcd for  $\text{C}_{12}\text{H}_{12}\text{NaO}_6$ , 275.0526))

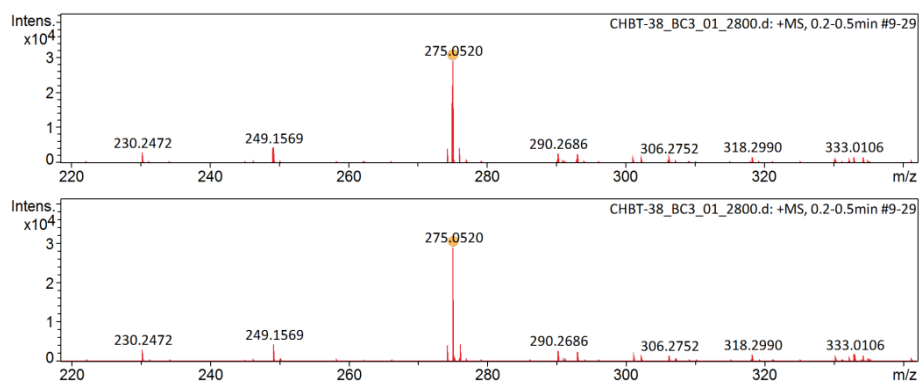

| Meas. $m/z$ | # | Ion Formula                              | $m/z$    | err [ppm] | mSigma | # mSigma | Score  | rdB | $e^-$ Conf | N-Rule | Adduct               |
|-------------|---|------------------------------------------|----------|-----------|--------|----------|--------|-----|------------|--------|----------------------|
| 275.0520    | 1 | $\text{C}_{12}\text{H}_{12}\text{NaO}_6$ | 275.0526 | 2.3       | 9.3    | 1        | 100.00 | 7.0 | even       | ok     | $\text{M}+\text{Na}$ |

Figure S25.  $^1\text{H}$  NMR (500 MHz,  $\text{CD}_3\text{OD}$ ) spectrum of new compound **4**

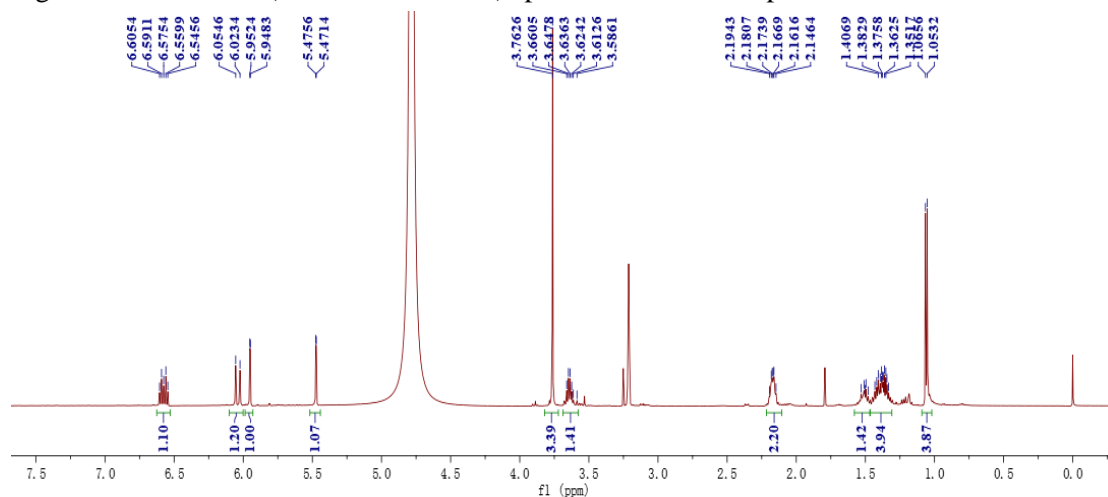

Figure S26.  $^{13}\text{C}$  NMR (125 MHz,  $\text{CD}_3\text{OD}$ ) spectrum of new compound **4**

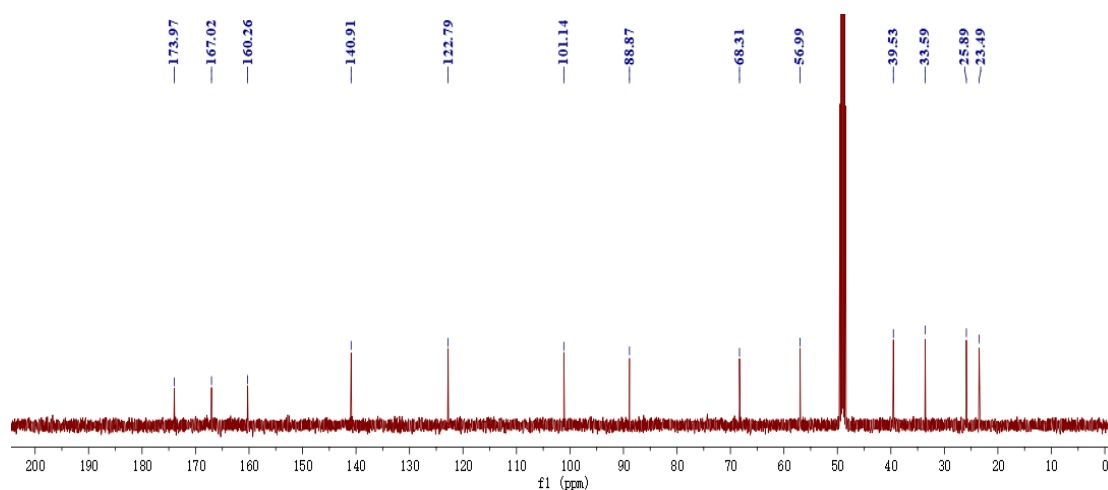

Figure S27. DEPT135 spectrum of new compound **4**

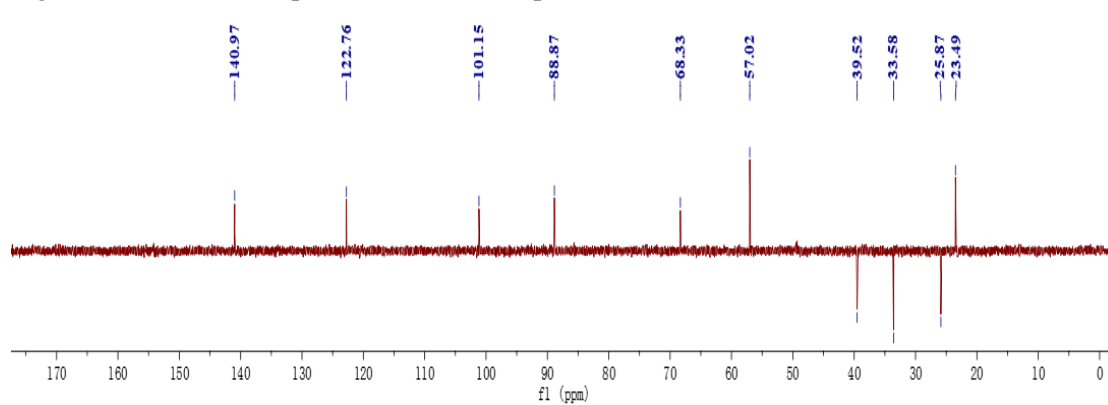

Figure S28. HSQC spectrum of new compound **4**

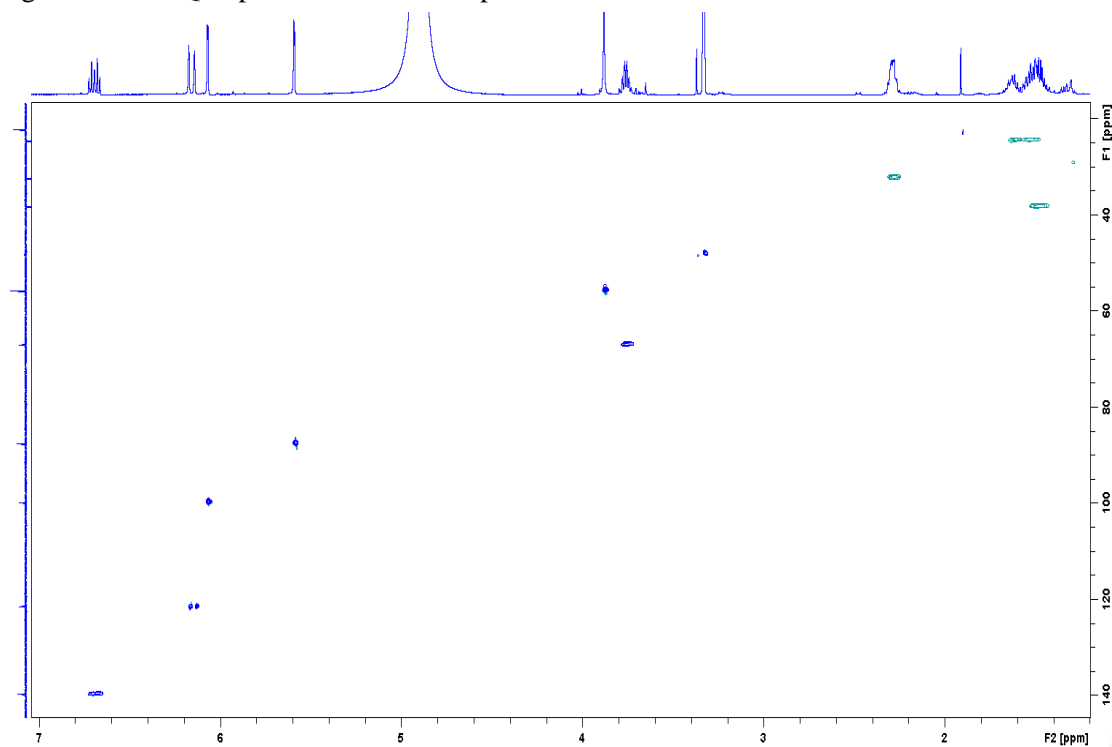

Figure S29. HMBC spectrum of new compound **4**

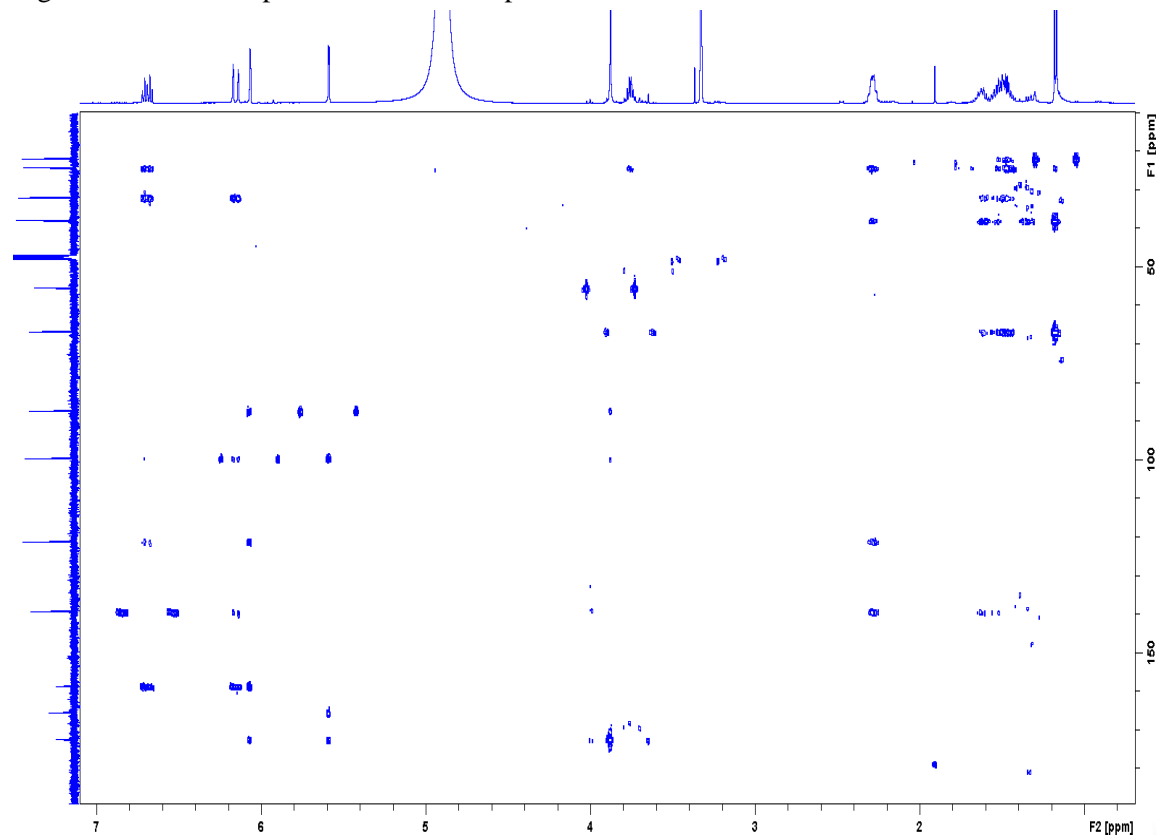

Figure S30.  $^1\text{H}$ - $^1\text{H}$  COSY spectrum of new compound **4**

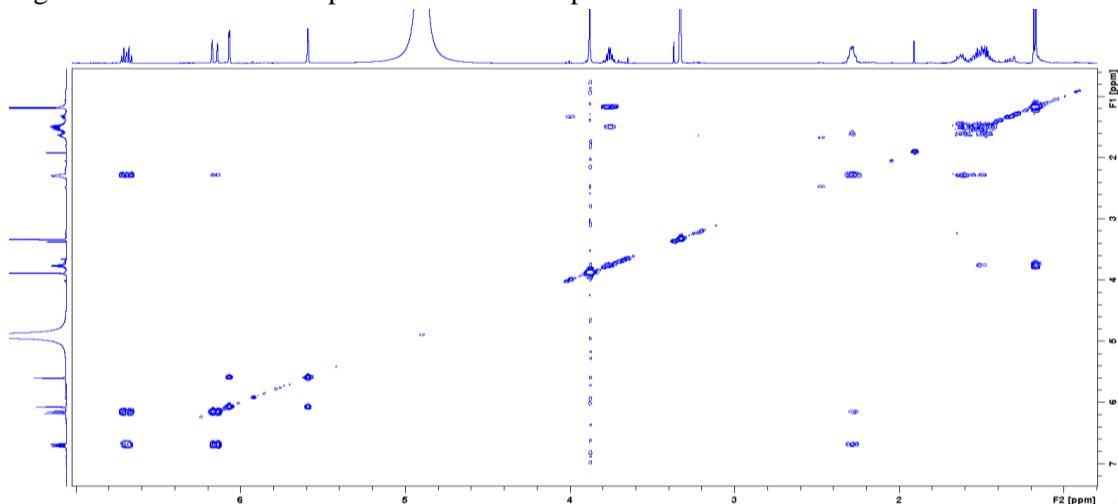

Figure S31. NOESY spectrum of new compound **4**

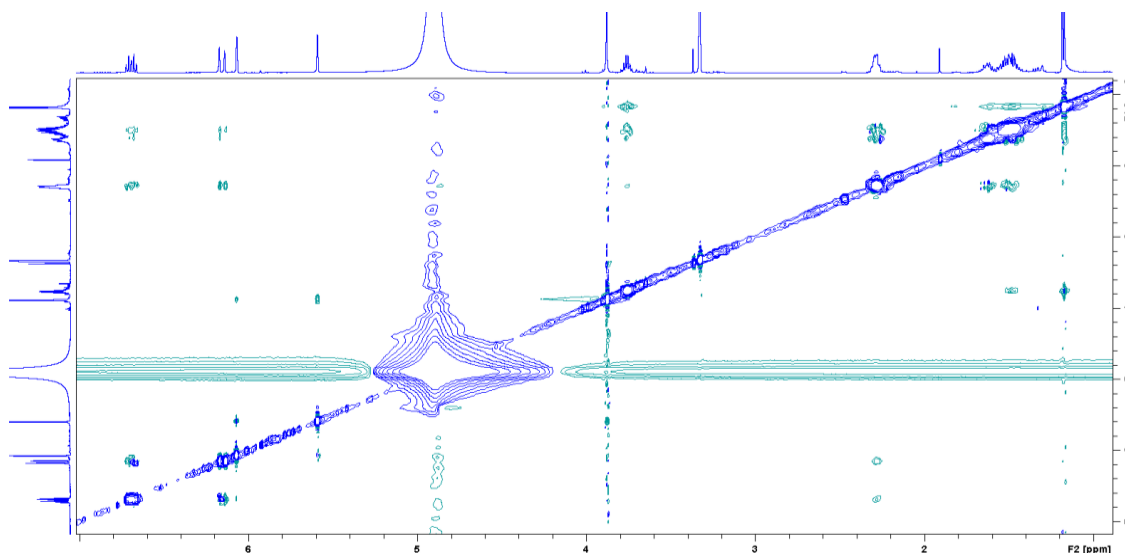

Figure S32. The HRESIMS spectrum of new compound **4** ( $m/z$  261.1095  $[\text{M}+\text{Na}]^+$  (calcd for  $\text{C}_{13}\text{H}_{18}\text{NaO}_4$ , 261.1097))

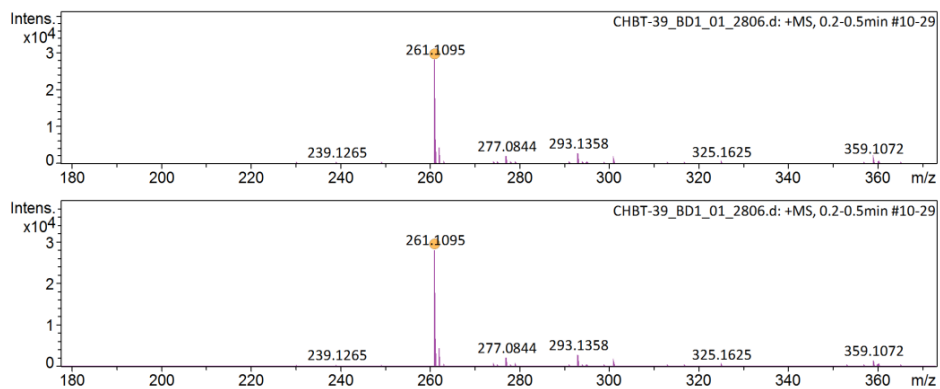

| Meas. m/z | # | Ion Formula                                      | m/z      | err [ppm] | mSigma | # mSigma | Score  | rdB | e <sup>-</sup> | Conf | N-Rule | Adduct |
|-----------|---|--------------------------------------------------|----------|-----------|--------|----------|--------|-----|----------------|------|--------|--------|
| 261.1095  | 1 | C <sub>13</sub> H <sub>18</sub> NaO <sub>4</sub> | 261.1097 | 1.0       | 7.3    | 1        | 100.00 | 5.0 | even           |      | ok     | M+Na   |
